# Supplementary material
Source: ML conference proceedings conference paper supplement (https://proceedings.mlr.press/v139/yoon21c.html)
Supplement: Supplementary file 1 [file yoon21c-supp.zip]

Archive with 1 entries (1 files):
- normalized_autoencoder_suppl.pdf
